# Supplementary material for: Ethylene is involved in strawberry fruit ripening in an organ-specific manner
Source: PubMed Central journal article supplement (PMC3808323; doi:10.1093/jxb/ert257), 2013-10-05
Supplement: supp_ert257_jexbot100586_file001.pdf [file supp_ert257_jexbot100586_file001.pdf]

## Supplementary Data

### Analysis of the role of ethylene in strawberry fruit ripening using ethylene-insensitive plants

Catharina Merchante, José G. Vallarino, Sonia Osorio, Irene Aragüez, Natalia Villarreal, María Ariza, Gustavo Fernández, Nieves Medina-Escobar, Marcos Civello, Alisdair R. Fernie, Miguel A. Botella, Victoriano Valpuesta.

Figure S1.

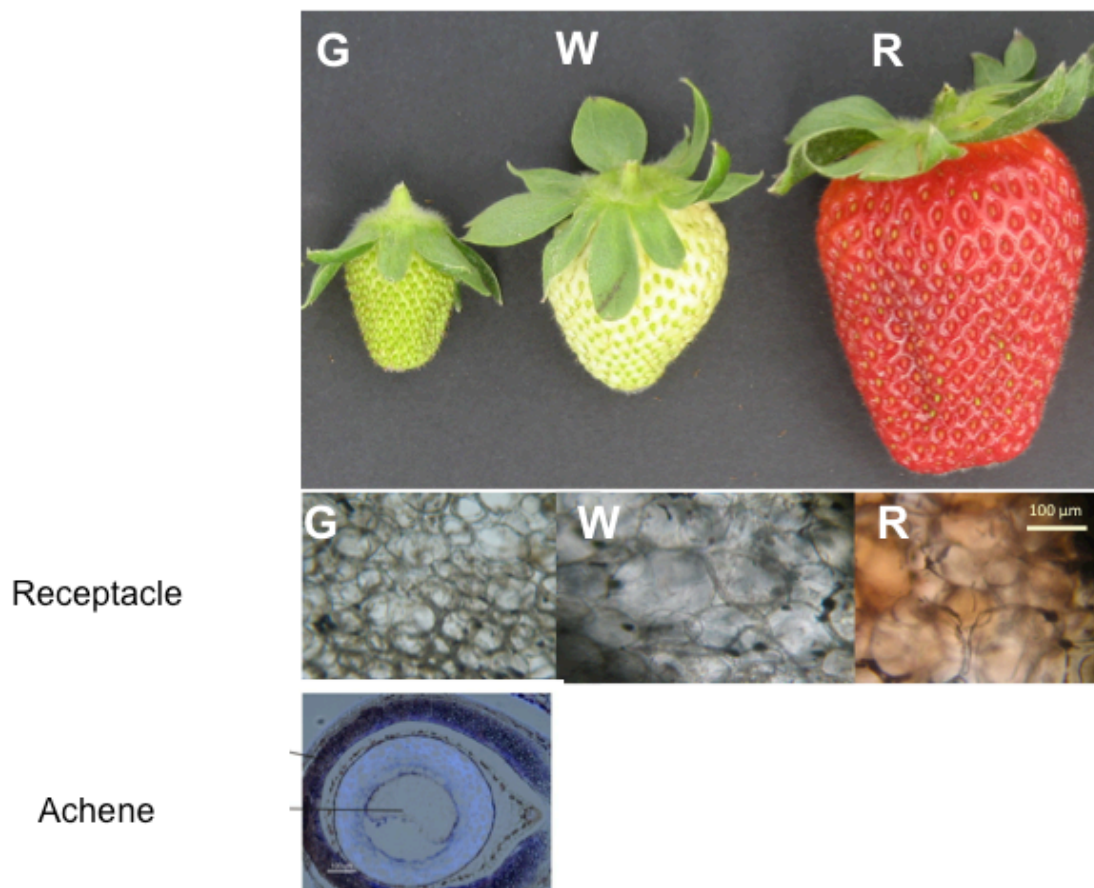

Illustration of strawberry fruit developmental stages selected for the studies. **A.** Photographs of representative fruits named as green (G), white (W) and red (R) stages of development. **B.** Sections of receptacle at the same stages (G, W, R) showed in A. **C.** Cross-section of the achene corresponding to the fruit at the G stage showed in A.

Figure S2.

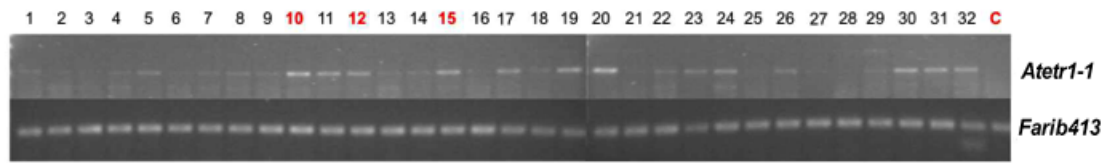

Expression of *Atetr1-1* by RT-PCR in 32 independent transgenic lines expressing the Arabidopsis gene. In red colour are indicated the lines selected for further studies.

**Supplemental Table 1.** List of primers

|                |                                                                                              |
|----------------|----------------------------------------------------------------------------------------------|
| <i>AtETR1</i>  | F (5'GTCGTGCCAACTGGGAG 3')<br>R (5'GGAGAGCGATTTGGTAGTTT 3')                                  |
| <i>FaACS1</i>  | F (5' CTTACCATCCCACCACCAAC 3')<br>R (5' TTCTTTTGCTCCTTGTGCTG 3')                             |
| <i>FvACS2</i>  | F (5' GATCCTGATCGTGTAGTCATGG 3')<br>R (5' GTTGTTTCGGGCCTTTTCG 3')                            |
| <i>FvACS3</i>  | F (5' ACCCGAAGGTGGTTCCTGC 3')<br>R (5' GATGCCGGAGTGTTTCAACT 3')                              |
| <i>FvACS4</i>  | F (5' CCAACTTGGGATCAAAGGA 3')<br>R (5' CCGACTTGGGTCAAACCTTAGC 3')                            |
| <i>FaACO1</i>  | F(5' TACCTCAAGCACCTTCCTCGC 3')<br>R (5' TTAGTGCCAAAGGTAGGACTA 3') (Trainotti et al., 2005)   |
| <i>FaACO2</i>  | F (5'GAAAGCACCTTCTTCTTGCG 3')<br>R (5'GCCTTAGCAGCCGTCATAAA 3') (Trainotti et al., 2005)      |
| <i>FvACO3</i>  | F (5'CCTTCTTGATGACAATGAGTGG 3')<br>R (5'CACCAACTCGGGTTGAGGAC 3')                             |
| <i>FaETR1</i>  | F (5'GGTGACCTCATTCCCGTCTTT 3')<br>R (ACAGGCCTCCATCAGAATTGA 3') (Trainotti et al., 2005)      |
| <i>FaETR2</i>  | F (5'GTTCGGCGTTGTTTTTAC 3')<br>R (5'AGCTTCCCTCGTCGTCAC 3') (Trainotti et al., 2005)          |
| <i>FaESR</i>   | F (5'CTTCAAGAGATTGGCGACCAC 3')<br>R (5'GGATCCATTTCTGGGCTGAG 3') (Trainotti et al., 2005)     |
| <i>FaPAL</i>   | F (5'GATGCAAAGGCTAAGGCAAG 3')<br>R (5'AGCCCTAACGCTCTCAACCT3') (Muñoz et al., 2011)           |
| <i>FaCHS</i>   | R (5' GCCTTTGTTTGAGCTGGTCT 3')<br>F (5' CCCAGGAACATCTTTGAGGA 3')(Muñoz et al., 2011)         |
| <i>FaMYB1</i>  | F (5'GGCGTGGTCGATCCAAGA 3')<br>R (5'GCAACCTTCGCCGTGTTTT 3')                                  |
| <i>FaMYB10</i> | F (5'TTACCAACAGAACCACCACAGA 3')<br>R (5'CCTCTAAACCAAGACCAGAACACA 3') (Lin-Wang et al., 2010) |
| <i>FaPE1</i>   | R (5' CAAGTGCACCCAACCTTCTGA 3')<br>F (5' CTGAGCTACCACAACGTCCA 3')(Osorio et al., 2008)       |

|                |                                                                                              |
|----------------|----------------------------------------------------------------------------------------------|
| <i>FaPLA</i>   | R (5' ACTTGGATGCCGCAGAGGA 3')<br>F (5' GAGGTGGGAGGGAAATGG 3') (Benitez-Burraco et al., 2003) |
| <i>FaPG1</i>   | R (5' TGGAGGAGTTGGAGATGGAAA 3')<br>F (5' AGAGTGAAATGGCTGGTGAGG 3')                           |
| <i>FaPG2</i>   | R (5' GCTCCTGGTGACTTTGATGTG 3')<br>F (5' CTCTACTTGGCGTTGTTGCTG 3')                           |
| <i>FaOMT</i>   | F (5'GCAGTTCTTGATGGTGGGATT 3')<br>R (5'ATGGTAATGGTGGAGTGGTCAG 3')                            |
| <i>FaQR</i>    | F (5'AGAACCTTGGGTGTTGATTTGG 3')<br>R (5'TTGTTACTACCTTCCCGCCTTC 3') (Raab et al., 2006)       |
| <i>FaGalUR</i> | F (5'CTGTAATCGGCATGGGAACT 3')<br>R (5'TGATGAGTTGGAGACGGAGA 3')                               |
| <i>FaGAPDH</i> | F (5'TCCATCACTGCCACCCAGAAGACTG 3')<br>R (5'AGCAGGCAGAACCTTCCGACAG 3') (Opazo et al 2010)     |

## References

**Benítez-Burraco A, Blanco-Portales R, Redondo-Nevado J, Bellido ML, Moyano E, Caballero JL, Muñoz-Blanco J.** 2003. Cloning and characterization of two ripening-related strawberry (*Fragaria x ananassa* cv. Chandler) pectate lyase genes. *Journal of Experimental Botany* **54**, 633-645.

**Lin-Wang L, Bolitho K, Grafon K, Kortstee A, Karunairetnam S, McGhie T, Espley R, Hellens R, Allan A.** 2010. An R2R3 MYB transcription factor associated with regulation of the anthocyanin biosynthetic pathway in Rosaceae. *BMC Plant Biology* **10**, 50.

**Muñoz C, Sánchez-Sevilla JF, Botella MA, Hoffmann T, Schwab W, Valpuesta V.** 2011. Polyphenol composition in the ripe fruits of *Fragaria* species and transcriptional analyses of key genes in the pathway. *Journal of Agricultural and Food Chemistry* **59**, 12598-12604

**Opazo M, Figueroa C, Henriquez J, Herrera R, Bruno C, Valenzuela P, Moya\_leon M.** 2010. Characterization of two divergent cDNAs encoding xyloglucan endotransglycosylase/hydrolase (XTH) expressed in *Fragaria chiloensis* fruit. *Plant Science* **179**, 479-488.

**Raab T, Lopez-Raez JA, Klein D, Caballero JL, Moyano E, Schwab W, Muñoz-Blanco J.** 2006 *FaQR*, required for the biosynthesis of the strawberry flavor compound 4-hydroxy-2,5-dimethyl-3(2H)-furanone, encodes an enone oxidoreductase. *Plant Cell* **18**: 1023-1037.

**Osorio S, Castillejo C, Quesada MA, Medina-Escobar N, Brownsey GJ, Suau R, Heredia A, Botella MA, Valpuesta V.** 2008. Partial demethylation of

oligogalacturonides by pectin methyl esterase 1 is required for eliciting defence responses in wild strawberry (*Fragaria vesca*). *Plant Journal* **54**, 43-55.

**Trainotti L, Pavanello A, Casadoro G.** 2005. Different ethylene receptors show an increased expression during the ripening of strawberries: does such an increment imply a role for ethylene in the ripening of these non-climacteric fruits? *Journal of Experimental Botany* **56**, 2037-2046.
